# Supplementary material for: Effects of EGFR Inhibitor on Helicobacter pylori Induced Gastric Epithelial Pathology in Vivo
Source: Pathogens. 2013 Oct 14;2(4):571–90. doi: 10.3390/pathogens2040571 (PMC4235704; doi:10.3390/pathogens2040571)
Supplement: Supplementary File 1 — Supplementary Material (PDF, 162 KB) [file pathogens-02-00571-s001.pdf]

## Supplementary Material for

### Effects of EGFR Inhibitor on *Helicobacter pylori* Induced Gastric Epithelial Pathology *in Vivo*

**Figure S1.** Sequence alignment of Mongolian gerbil *Adam17*, *Egfr* and *Hb-egf*. (A) Alignment of 213 bp portion *Adam17* cDNA sequence for the Mongolian gerbil, mouse, rat, Chinese hamster and human. Those nucleotides in other species which are similar to those in the Mongolian gerbil are typed in stars, while those different are typed in letters. The degree of nucleotide identity observed between Mongolian gerbil and other species were 95% for mouse (Accession No. 9945314), 95% for rat (Accession No. 9945329), 95% for Chinese hamster (Accession No. AF380348) and 94% for human (Accession No. 14722411); (B) Alignment of 216 bp portion *Egfr* cDNA sequence for the Mongolian gerbil, mouse, rat, Chinese hamster and human. Those nucleotides in other species which are similar to those in the Mongolian gerbil are typed in stars, while those different are typed in letters. The degree of nucleotide identity observed between Mongolian gerbil and other species was 92% for mouse (Accession No. AF275367), 91% for rat (Accession No. M37394), and 80% for human (Accession No. X00588); (C) Alignment of 200 bp portion (*Hb-egf*) cDNA sequence for the Mongolian gerbil, mouse, rat, Chinese hamster and human. Those nucleotides in other species which are similar to those in the Mongolian gerbil are typed in stars, while those different are typed in letters. The degree of nucleotide identity observed between Mongolian gerbil and other species was 93% for mouse (Accession No. 6754177), 93% for rat (Accession No. L05489), 90% for Chinese hamster (Accession No. AF069753) and 79% for human (Accession No. M60278). Nucleotides identical to those in the Mongolian gerbil are indicated by \*; Numbers in the right hand column are the nucleotide position assigned in each of the respective database entries. Primer sites for qPCR in bold.

**A. Adam17 sequence**

CGTACGTCGATGCAGAGCAAAAAGAACTTATTTTGGAGGAAAGGGGAAGCCC 50 Gerbil  
 \*\*\*\*\*G\*\*\*\*\*A 1887 Mouse  
 \*T\*\*\*\*\* 2128 Rat  
 C\*\*\*T\*\*\*\*\* 1872 C.hamster  
 \*C\*\*T\*\*\*\*\*A\*\*\*\*\* 2051 Human

TGTACAGTAGGGTTTTGTGATATGAATGGAAAAATGTGAAAAACGAGTACA 100 Gerbil  
 \*\*\*\*\*C\*\*C\*\*\*\*\*C\*\*\*\*\*G\*\*\*\*\* 1937 Mouse  
 \*\*\*\*\*C\*\*\*\*\*C\*\*\*\*\*G\*\*\*\*\*G\*\*\*\*\* 2178 Rat  
 \*\*\*\*\*C\*\*\*\*\*C\*\*C\*\*\*\*\*T\*\* 1922 C.hamster  
 \*\*\*\*\*A\*\*\*\*\*C\*\*\*\*\*C\*\*\*\*\*G\*\*\*\*\* 2101 Human

GGATGTAATTGAGCGATTTTGGGATTTTCATTGACCAGCTGAGCATCAACA 150 Gerbil  
 \*\*\*C\*\*\*\*\* 1987 Mouse  
 \*\*\*C\*\*\*\*\*G\*\*\*\*\* 2223 Rat  
 \*\*\*\*\* 1972 C.hamster  
 \*\*\*\*\*A\*\*\*\*\*T\* 2151 Human

CTTTCGGAAAGTTTTTGGCAGACAACATCGTTGGGTCTGTTCTGGTTTTTC 200 Gerbil  
 \*\*\*\*T\*\*G\*\*\*\*\*C\*\*\*\*\*T\*\*\*\*\* 2037 Mouse  
 \*\*\*\*T\*\*G\*\*\*\*\*C\*\*\*\*\* 2273 Rat  
 \*\*\*\*T\*\*G\*\*\*\*\*A\*\*\*\*\*C\*\*C\*\*\*\*\* 2022 C.hamster  
 \*\*\*\*T\*\*\*\*\*A\*\*\*\*\*C\*\*\*\*\* 2201 Human

TCCTTGATATTTT 213 Gerbil  
 \*\*\*\*\* 2050 Mouse  
 \*\*\*\*\* 2286 Rat  
 \*\*\*\*\* 2035 C.hamster  
 \*\*\*\*\* 2014 Human

**B. Egfr sequence**

TGGCTGGCTATGTGCTCATTGCCCTCAACACTGTGGAGAGGATCCCTCTGGAGAACCCTGC 60 Gerbil  
 \*\*\*\*\*C\*\*\*\*\*C\*\*\*\*\*C\*\*\*\*\*A\*\*\*\*\*T\*\*\*\*\* 536 Mouse  
 \*\*\*\*\*T\*\*\*\*\*G\*\*\*\*\*C\*\*\*\*\*A\*\*\*\*\*T\*\*\*\*\* 466 Rat  
 \*\*\*\*\*T\*\*\*\*\*C\*\*\*\*\*A\*\*\*\*\*C\*A\*\*T\*\*T\*\*\*A\*\*\*\*\* 499 Human

AAATCATCAGGGGAAATGCTCTGTACGAAAAACCTATGCCTTAGCCGTCCTGTCCAAC 120 Gerbil  
 \*G\*\*\*\*\*T\*\*T\*\*\*\*\*A\*\*\*\*\* 596 Mouse  
 \*G\*\*\*\*\*C\*\*\*\*\*C\*\*\*\*\* 526 Rat  
 \*G\*\*\*\*\*A\*\*\*\*\*ATGTAC\*\*\*\*\*TT\*\*\*\*\*A\*\*\*T\*A\*\*T\*\*\* 559 Human

ACGGGGCAAACAGAACTGGGCTCAGGGAACCTATGCGGAACCTACAGGAAATCCTGA 180 Gerbil  
 \*T\*\*\*A\*\*\*\*\*T\*\*\*\*\*C\*\*\*\*\* 656 Mouse  
 \*T\*\*A\*A\*C\*\*\*A\*\*\*\*\*T\*\*\*\*\*C\*\*\*\*\*T\*\*\*\* 586 Rat  
 \*T\*AT\*\*\*\*\*T\*A\*\*\*C\*\*A\*\*G\*A\*\*\*G\*\*\*\*\*C\*\*A\*A\*\*T\*\*\*\*\*C 619 Human

CCGGTGCTGTGCGGTTTCAGCAACAACCCCATCTCT 216 Gerbil  
 TT\*\*\*\*\*A\*\*\*\*\* 692 Mouse  
 T\*\*\*\*\*A\*\*T\*\*\*\*\* 622 Rat  
 AT\*\*C\*\*C\*\*\*\*\* 647 Human

Figure S1. Cont.

**C. Hb-egf sequence**

```

GTGTTGTCTGCGTTGGTGACCGGTGAGAGTCTGGAGCGGCTTCGGAGAGG  50 Gerbil
***** 356 Mouse
***** 126 Rat
*****A**A*****C***** 102 C.hamster
**TC*C**G*CAC*****C***** 356 Human

TCTGGCGGCAGCAACCAGCAACCCTGACCCTCCTACTGGATCCACACACC 100 Gerbil
*****C*****A*** 406 Mouse
*****C*****A*****A*** 176 Rat
*****A*****T*****C*****A*** 152 C.hamster
G**A**T**T**G*****G*****C****T*****GG*** 406 Human

AGCTGTTACCCACGGGAGGCGATCGCACTCAGGAAGTCCAGGACTTGGAT 150 Gerbil
*****C*****T*****TG*****GG*****A 456 Mouse
*****C*****CT*****G*****G*****A 226 Rat
*****C*****AT*G***TGG*****A 202 C.hamster
*****C*****CTA*****GC**GGAC*G*A*****GT*****C*A 456 Human

AAGACAGACCTGGACATTTTCAGAGTTGCTTTCTCCTCCAAGCCACAAG 200 Gerbil
GG*****T***A**C*****A***** 506 Mouse
GG***C**T*****C*****A***** 276 Rat
G*****T*C*****C***** 252 C.hamster
G**G*****T*****C*****G*****CA*****A***** 406 Human

```
